# Supplementary material for: A gridded dataset of a leaf-age-dependent leaf area index seasonality product over tropical and subtropical evergreen broadleaved forests
Source: Copernicus journal article supplement (doi:10.5194/essd-15-2601-2023), 2023-06-27
Supplement: Supplementary file 1 [file essd-15-2601-2023-supplement.pdf]

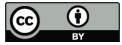

*Supplement of*

## **A gridded dataset of a leaf-age-dependent leaf area index seasonality product over tropical and subtropical evergreen broadleaved forests**

**Xueqin Yang et al.**

*Correspondence to:* Xiuzhi Chen ([chenxzh73@mail.sysu.edu.cn](mailto:chenxzh73@mail.sysu.edu.cn))

The copyright of individual parts of the supplement might differ from the article licence.

## Supplementary Methods

### (1) ERA-Interim VPD

We calculated vapor pressure deficits (VPD) from the 0.125° spatial resolution land air temperature ( $T_a$ ) and dew point temperature ( $T_d$ ) ERA-Interim dataset, which is a reanalysis product based on the Integrated Forecast System of the European Centre for Medium-Range Weather Forecasts (ECMWF-IFS). The calculation (Dee et al. 2011) follows:

$$VPD = SVP - AVP$$

$$AVP = 6.112 \times f_w \times \exp\left(\frac{17.67 \times T_d}{T_d + 243.5}\right)$$

$$SVP = 6.112 \times f_w \times \exp\left(\frac{17.67 \times T_a}{T_a + 243.5}\right)$$

where SVP and AVP are saturated vapor pressure and actual vapor pressure (hPa), respectively.  $T_a$  and  $T_d$  are the land air temperature (°C) and dew point temperature (°C), respectively.

$$f_w = 1 + 7 \times 10^{-4} + 3.46 \times 10^{-6} \times P_{mst}$$

$$P_{mst} = P_{msl} \times \left(\frac{(T_a + 273.16)}{(T_a + 273.16) + 0.0065 \times Z}\right)^{5.625}$$

where  $P_{mst}$  is the air pressure,  $P_{msl}$  is the air pressure at mean sea level (1013.25 hPa) and  $Z$  is the altitude.

### (2) ERA5-Land 2m $T_{air}$

The ERA5-Land 2m air temperature data were supplied by the European Centre for Medium Range Weather Forecasts (ECMWF). ERA5-Land is a reanalysis dataset providing a consistent view of the evolution of land variables over several decades at an enhanced resolution compared to ERA5 (Zhao, Gao et al., 2020). This parameter is the temperature of air at 2m above the surface of land, sea or in-land waters. It is calculated by interpolating between the lowest model level and the Earth's surface, taking account of the atmospheric conditions. The unit is kelvin (K) (Muñoz-Sabater et al., 2021).

### (3) BESS SW

The Breathing Earth System Simulator (BESS) is a simplified process-based model that couples atmosphere and canopy radiative transfers, canopy photosynthesis, transpiration, and energy balance. It couples an atmospheric radiative transfer model and artificial neural network with forcings from MODIS atmospheric products.

### (4) RTSIF

RTSIF dataset is in good agreement with the original TROPOMI SIF, and its accuracy is further validated against tower-based SIF (Chen et al., 2022). The TROPospheric Monitoring Instrument (TROPOMI) on the Copernicus Sentinel-5P mission enables significant improvements in providing high spatial and temporal resolution SIF observations, but the

35 short temporal coverage of the data records has limited its applications in long-term studies  
36 (Veefkind et al., 2012). RTSIF uses machine learning to reconstruct TROPOMI SIF for 2001-  
37 2020 with a spatial resolution of 0.05° and a temporal resolution of 8 days. We resample  
38 temporal resolution as monthly.

#### 39 (5) GOSIF-derived GPP

40 The GOSIF-derived GPP are generated based on various SIF-GPP relationships for the  
41 period from 2000 to 2022. At site-level, the universal and biome-specific SIF-GPP  
42 relationships are established based on SIF soundings from Orbiting Carbon Observatory-2  
43 (OCO-2) and GPP data from 64 EC sites (Li and Xiao, 2019). And at grid cell level, a SIF-  
44 GPP relationship is established based on 0.05° GOSIF data and tower GPP. All these SIF-  
45 GPP relationships with different forms (universal and biome-specific, with and without  
46 intercept) at both site and grid cell levels performed well in estimating GPP globally.

#### 47 (6) FLUXCOM GPP

48 The FLUXCOM GPP are estimated from 3 machine learning methods (RF, ANN,  
49 MARS) which were forced with CRUNCEPv6 meteorological data and mean seasonal cycles  
50 of several MODIS based variables to merge carbon flux measurements from FLUXNET eddy  
51 covariance towers with remote sensing and meteorological data (Jung et al., 2019).  
52 FLUXCOM GPP was well validated and was provided at 0.5° spatial resolutions and monthly  
53 intervals from 1980-2013 (Tramontana et al., 2016).

54  
55  $T_{\text{air}}$  and SW can be obtained directly from the relevant website. All of datasets used in  
56 this study are listed in Table S3. The air temperature ( $T_{\text{air}}$ ) gridded files are available at  
57 website: <https://rda.ucar.edu/datasets/ds314.3/>. The ERA-Interim reanalysis datasets are  
58 available at website: [https://www.ecmwf.int/en/forecasts/datasets/reanalysis-datasets/era-](https://www.ecmwf.int/en/forecasts/datasets/reanalysis-datasets/era-interim)  
59 [interim](https://www.ecmwf.int/en/forecasts/datasets/reanalysis-datasets/era-interim). (Dee et al., 2011). The Breathing Earth System Simulator (BESS) incoming  
60 shortwave solar radiation (SW) gridded files are available at website:  
61 [http://environment.snu.ac.kr/bess\\_rad/](http://environment.snu.ac.kr/bess_rad/). (Ryu et al. 2018). The reconstructed TROPOMI solar-  
62 induced fluorescence dataset (RTSIF) is available at website:  
63 <https://doi.org/10.6084/m9.figshare.19336346.v2>. (Chen et al., 2022). The MODIS Enhanced  
64 Vegetation Index (EVI) data are available at website:  
65 <https://modis.gsfc.nasa.gov/data/dataproduct/mod13.php>. The GOSIF-derived GPP datasets are  
66 available at website: [http://data.globalecology.unh.edu/data/GOSIF-GPP\\_v2/](http://data.globalecology.unh.edu/data/GOSIF-GPP_v2/). (Li and Xiao,  
67 2019). The FLUXCOM GPP are available at website: [https://www.bgc-](https://www.bgc-jena.mpg.de/geodb/projects/Home.php)  
68 [jena.mpg.de/geodb/projects/Home.php](https://www.bgc-jena.mpg.de/geodb/projects/Home.php). (Jung et al., 2019)

69

70

### Supplementary Figures

71

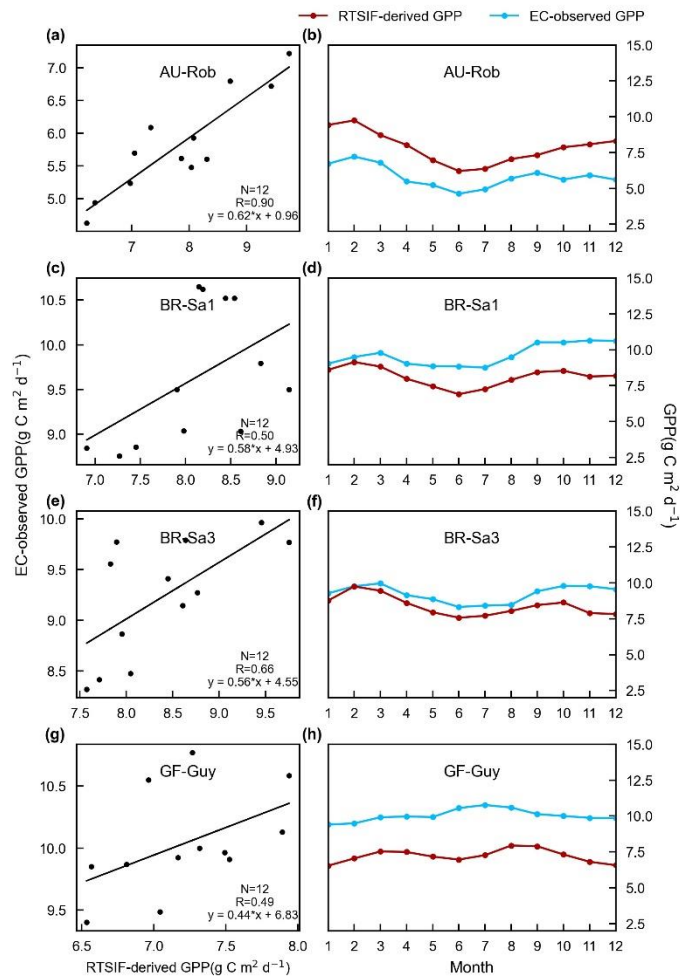

72

73 **Figure S1.** Comparisons between monthly RTSIF-derived GPP (red) and observed GPP at  
74 eddy covariance (EC) tower sites (blue). (a-b) Au-Rob, (c-d) BR-Sa1, (e-f) BR-Sa3, and (g-h)  
75 GF-Guy.

76

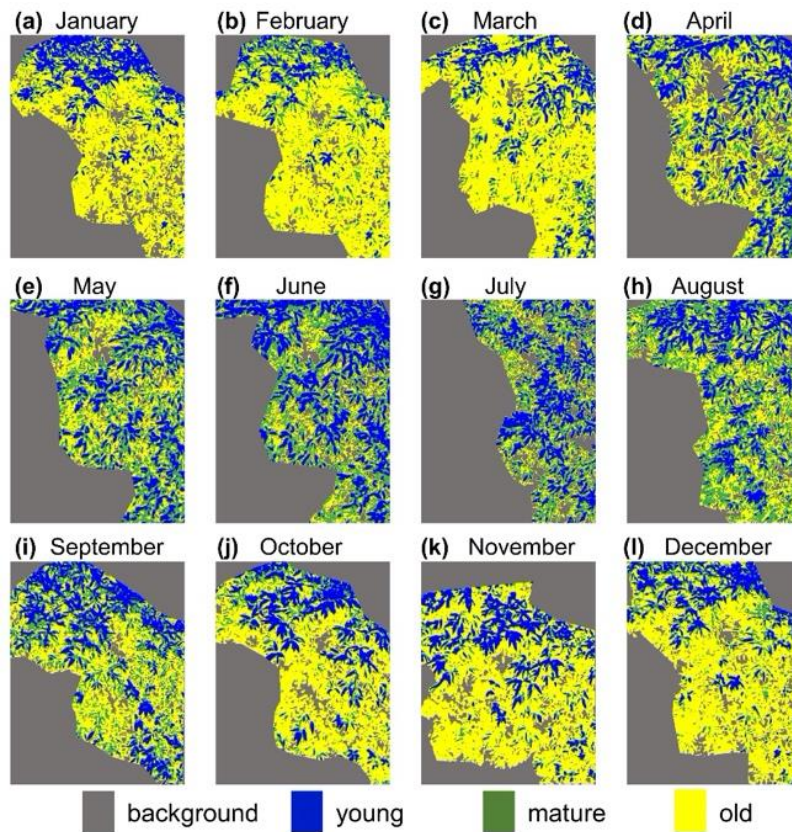

77

78 **Figure S2.** Classifications of canopy leaves into young, mature and old age cohorts in  
 79 Dinghushan station. The boundaries of the imageries are those of the tree canopies that vary  
 80 between months.

81

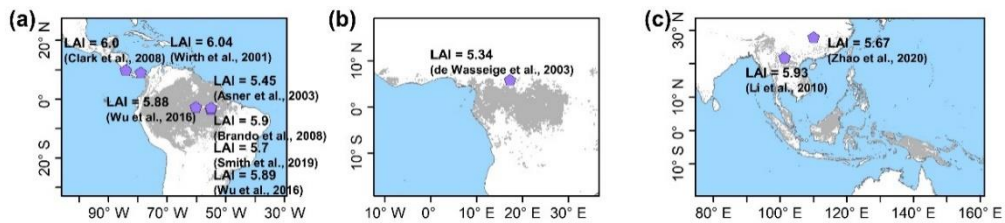

82

83 **Figure S3.** The distribution map of measured LAI sites from previously published literatures.

84

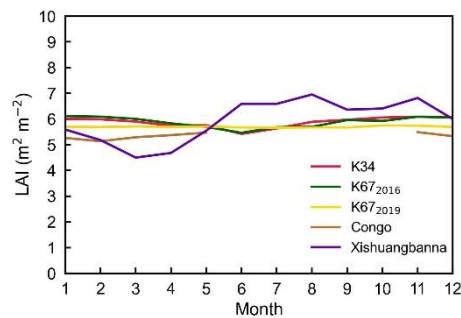

85

86 **Figure S4.** The seasonality of observed total LAI values from previously published  
 87 literatures.

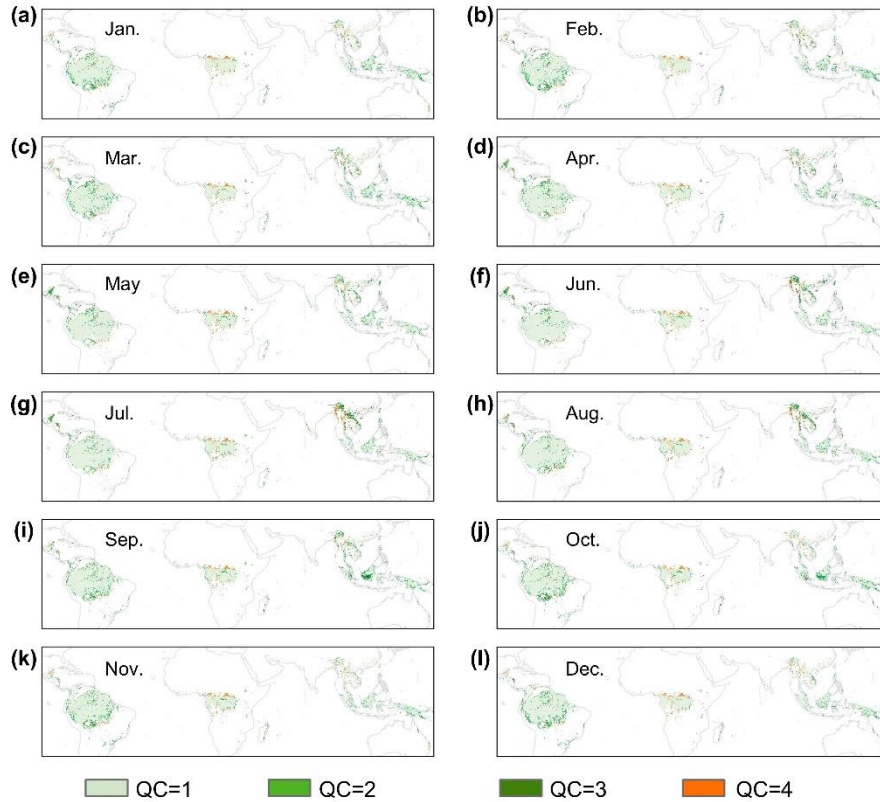

88

89 **Figure S5.** Spatial patterns of seasonal quality control (QC) datasets.

90

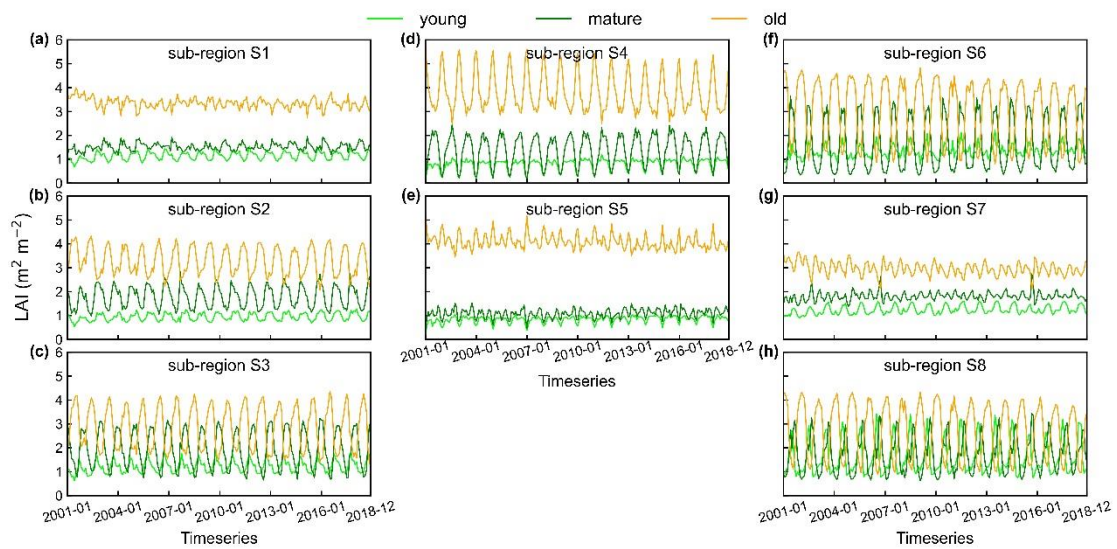

91

92 **Figure S6.** Timeseries of simulated  $LAI_{young}$ ,  $LAI_{mature}$ , and  $LAI_{old}$  in 8 sub-regions classified  
 93 by the K-means clustering analysis. Limegreen represents  $LAI_{young}$ ; green represents  $LAI_{mature}$ ;  
 94 and orange represents  $LAI_{old}$ .

95

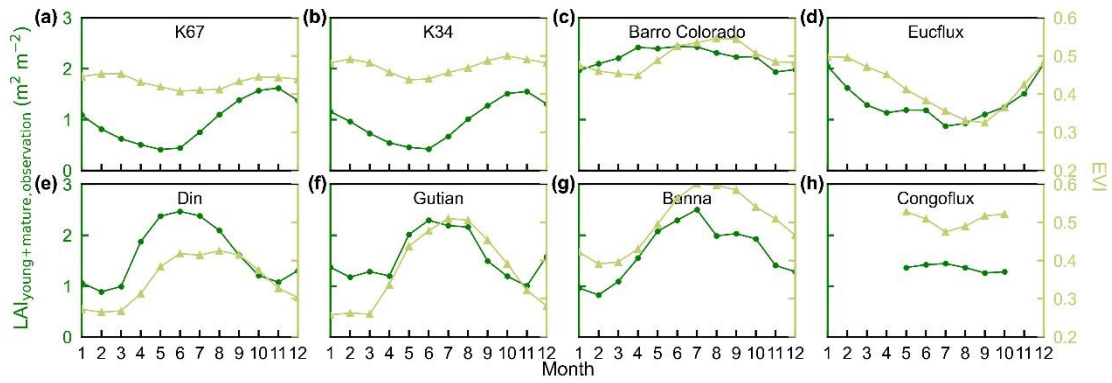

96  
97  
98  
99  
100  
101  
102

**Figure S7.** Comparison of the seasonality of  $LAI_{\text{young+mature}}$  observations and MODIS Enhanced Vegetation Index (EVI) at eight camera-based observation sites. Green lines with circle markers present LAI observations; olive lines with triangle markers present EVI. (a) K67; (b) K34; (c) Barro Colorado; (d) EUCFLUX; (e) Din; (f) Gutian; (g) Banna; (h) CONGOFLUX

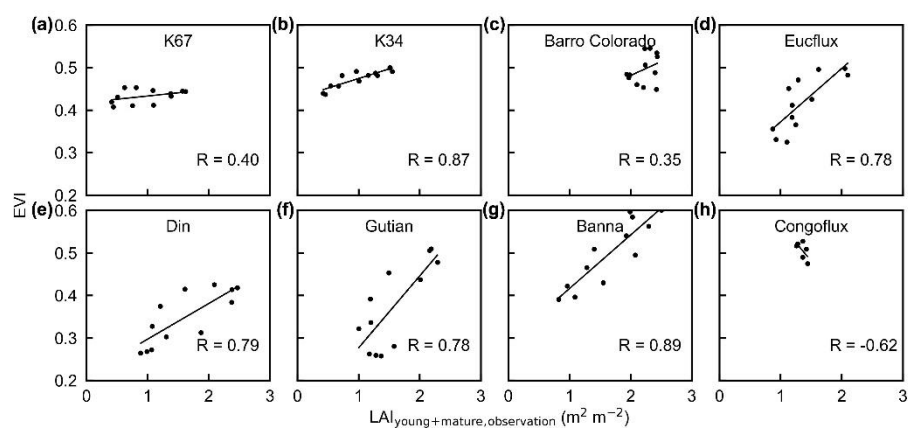

103  
104  
105  
106

**Figure S8.** The scatterplots of observed  $LAI_{\text{young+mature}}$  against EVI at 8 camera-based observation sites across study area.

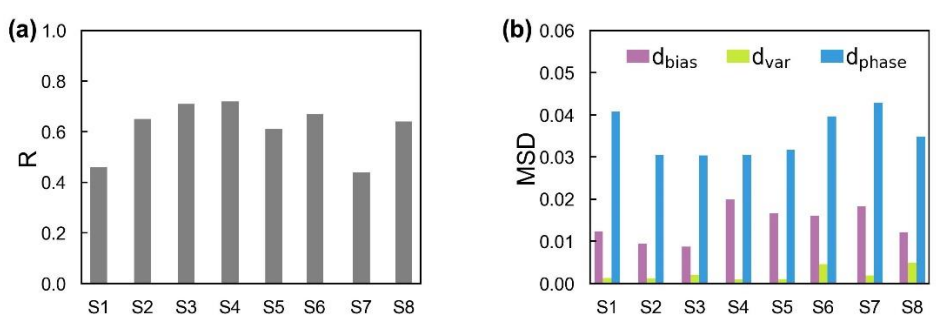

107  
108  
109  
110  
111

**Figure S9.** Statistics of the mean Pearson correlation coefficient (R) and mean squared deviation (MSD) between seasonality of simulated  $LAI_{\text{young+mature}}$  and MODIS Enhanced Vegetation Index (EVI) in the 8 clustered sub-regions. (a) Mean of correlation coefficients in each sub-region; (b) mean of  $d_{\text{bias}}$ ,  $d_{\text{var}}$  and  $d_{\text{phase}}$  in each sub-region.

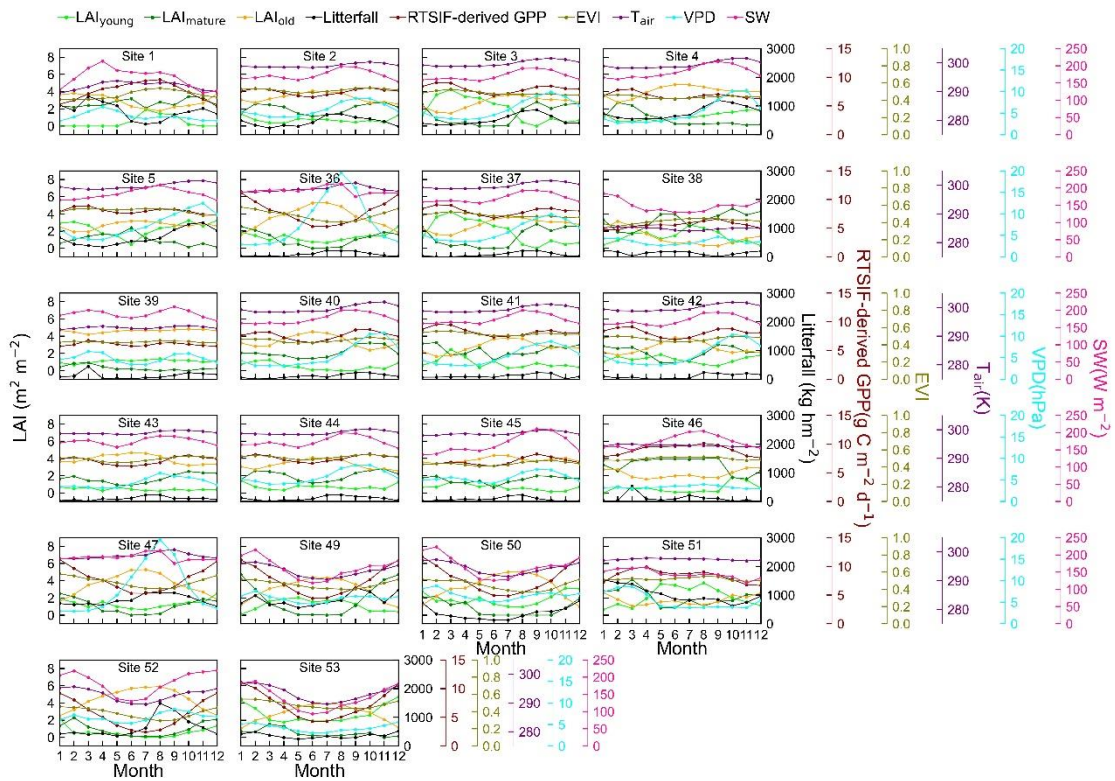

113

114 **Figure S10.** Seasonality of  $LAI_{young}$ ,  $LAI_{mature}$ ,  $LAI_{old}$ , litterfall, RTSIF-derived GPP, EVI,

115  $T_{air}$ , VPD and SW at 22 sites in south America.

116

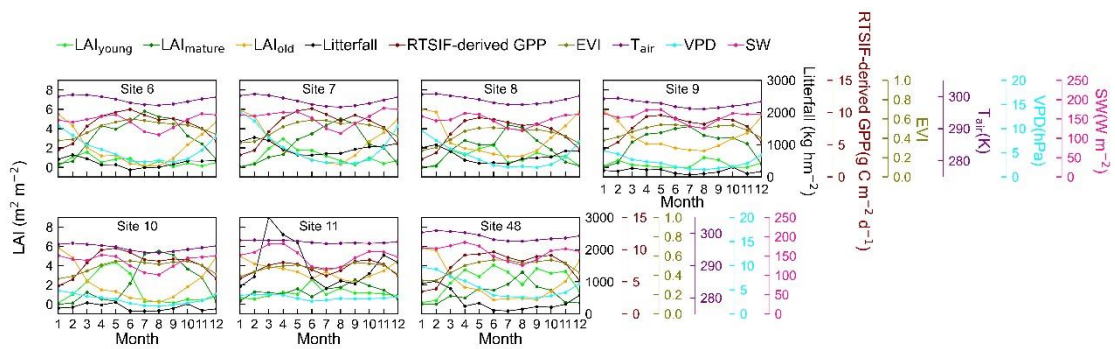

117

118 **Figure S11.** Seasonality of  $LAI_{young}$ ,  $LAI_{mature}$ ,  $LAI_{old}$ , litterfall, RTSIF-derived GPP, EVI,

119  $T_{air}$ , VPD and SW at 7 sites in Congo.

120



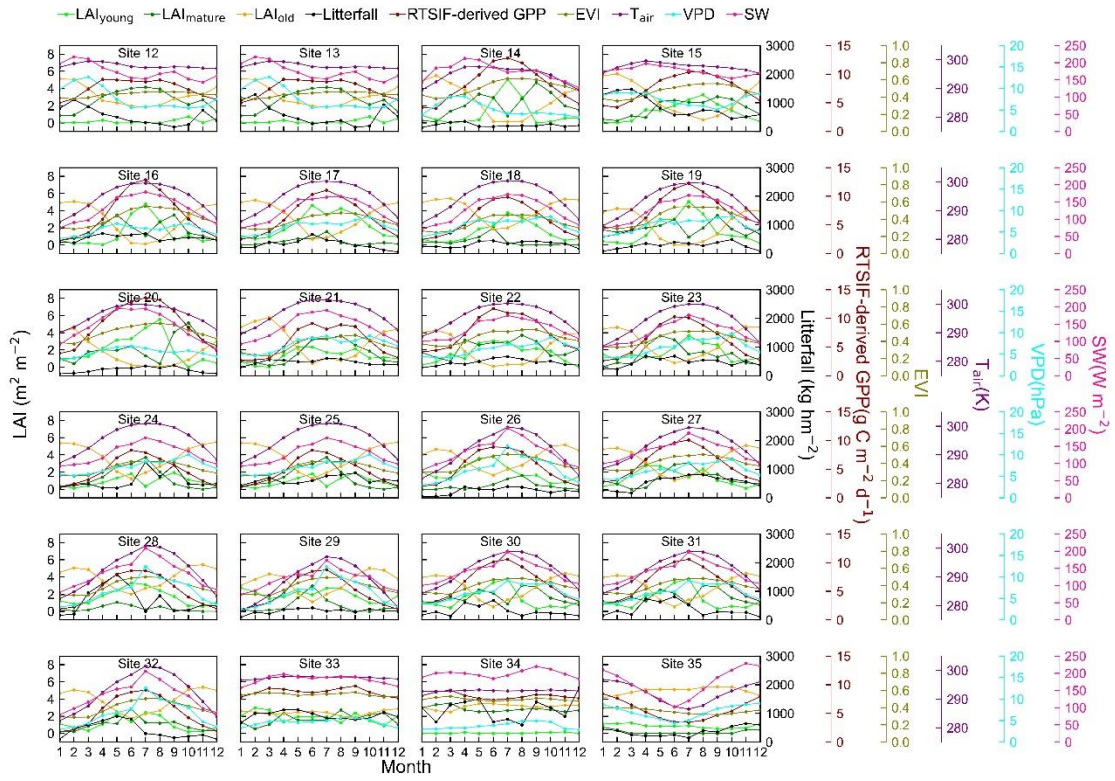

121

122 **Figure S12.** Seasonality of LAI<sub>young</sub>, LAI<sub>mature</sub>, LAI<sub>old</sub>, litterfall, RTSIF-derived GPP, EVI,

123 T<sub>air</sub>, VPD and SW at 24 sites in tropical Asia.

124

125

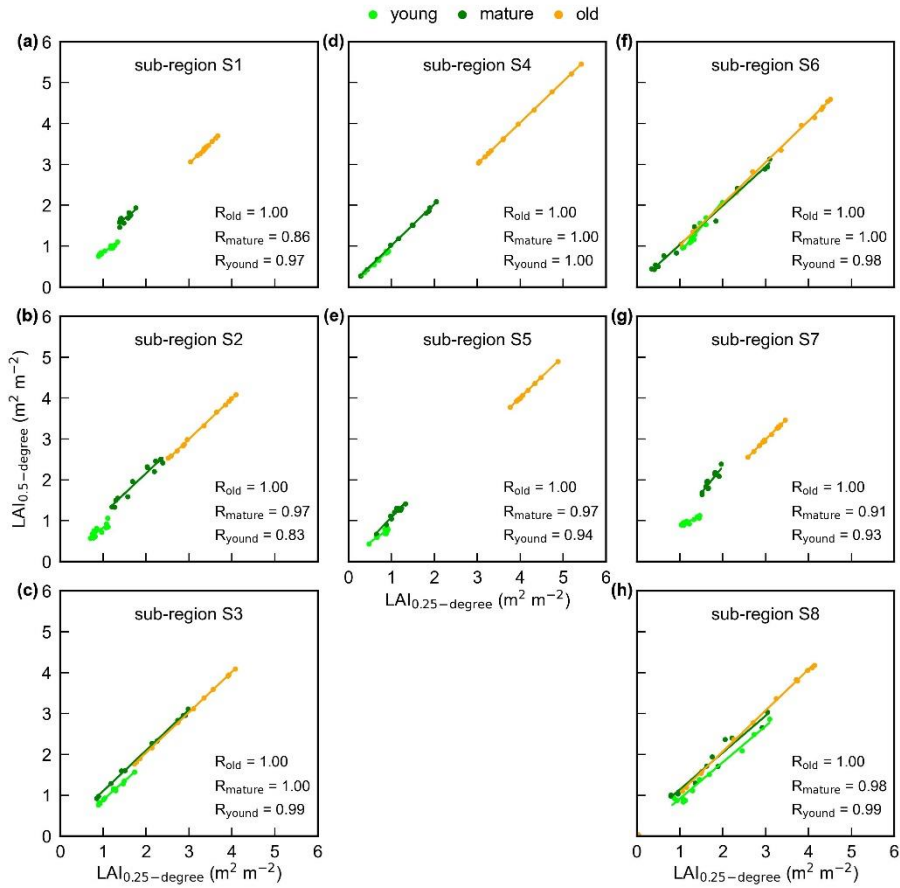

126

127 **Figure S13.** The scatterplot of 0.25-degree  $LAI_{young}$ ,  $LAI_{mature}$ ,  $LAI_{old}$  against 0.5-degree LAI  
 128 cohort datasets in the 8 clustered regions.

129

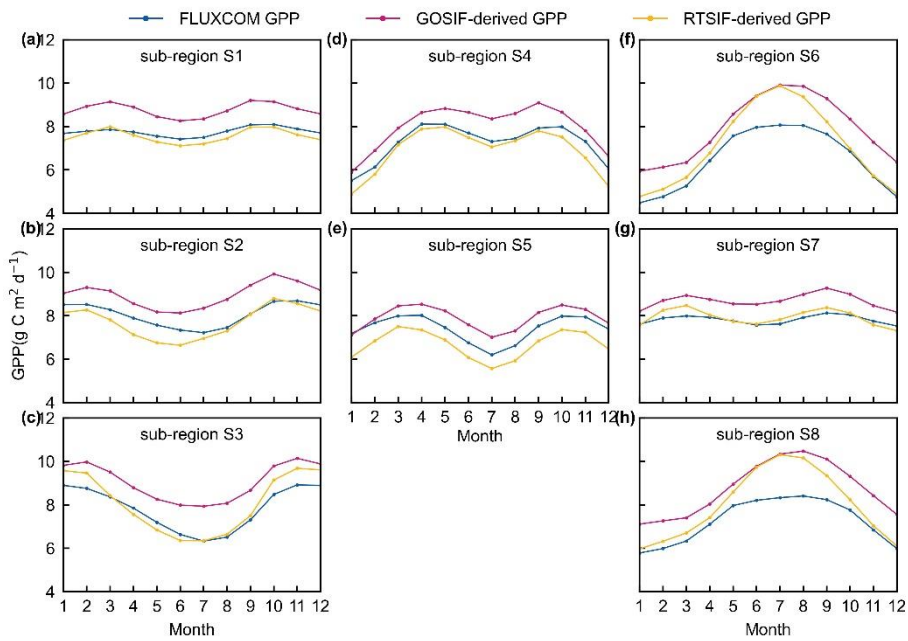

130

131 **Figure S14.** Seasonality of RTSIF-derived GPP (yellow lines), GOSIF-derived GPP (pink  
 132 lines) and FLUXCOM GPP (blue lines) datasets in 8 sub-regions classified by the K-means  
 133 clustering analysis. (a-c) South America; (d-e) Congo; (f-h) tropical Asia.  
 134

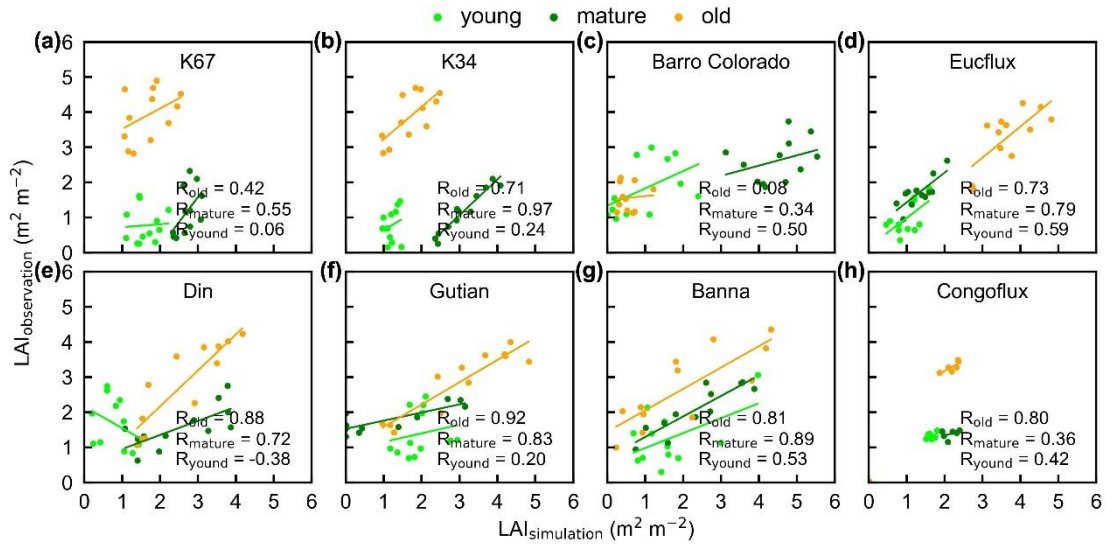

135  
 136 **Figure S15.** The scatterplots of simulated LAIs generated from GOSIF-derived GPP against  
 137 observed LAIs at 8 camera-based observation sites across study area.  
 138

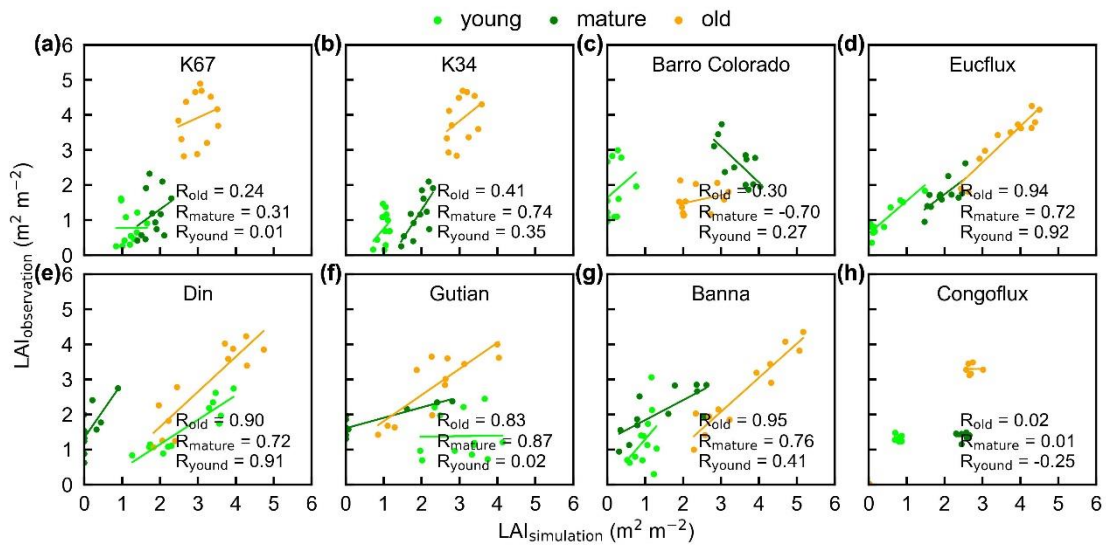

139  
 140 **Figure S16.** The scatterplots of simulated LAIs generated from FLUXCOM GPP against  
 141 observed LAIs at 8 camera-based observation sites across study area.  
 142

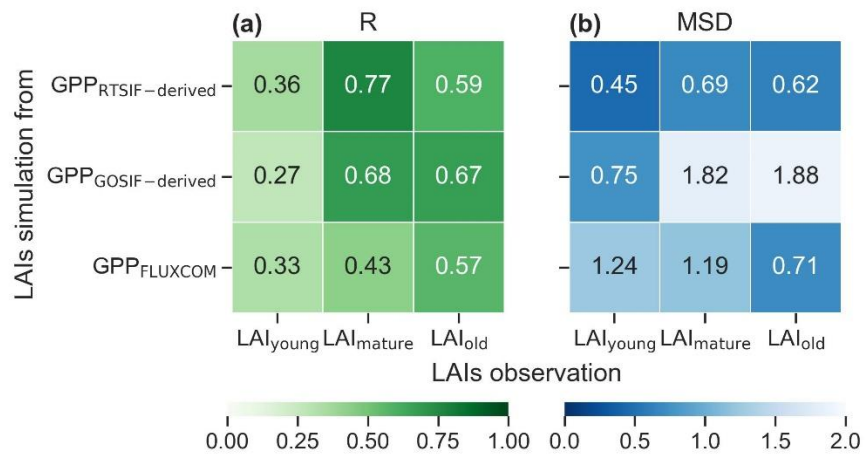

143

144 **Figure S17.** Comparison of RTSIF-derived GPP (upper panels), GOSIF-derived GPP (middle  
 145 panels) and FLUXCOM GPP (bottom panels) datasets at 8 observation sites. (a) The  
 146 correlation coefficients (R); (b) mean squared deviation (MSD).

147

148

**Supplementary Tables**

149

150

**Table S1** Information of eight sites with observations of LAI cohorts

| <b>Site ID</b> | <b>Site Name</b>                                                             | <b>Latitude</b> | <b>Longitude</b> |
|----------------|------------------------------------------------------------------------------|-----------------|------------------|
| K67            | Santarem-Km67-Primary Forest<br>Ecosystem Research Station                   | -2.86           | -54.96           |
| K34            | Manaus-K34 Forest Ecosystem<br>Research Station                              | -2.61           | -60.21           |
| Barro Colorado | Smithsonian Tropical Research<br>Institute, Barro Colorado Island,<br>Panama | 9.15            | -79.85           |
| Eucflux        | Eucalyptus Plantation, Sao Paulo<br>state, Brazil                            | -22.97          | -48.73           |
| Congoflux      | Tropical Forest, DR Congo                                                    | 0.81            | 24.50            |
| Din            | Dinghushan Forest Ecosystem<br>Research Station                              | 23.17           | 112.54           |
| Gutian         | Gutianshan Natural Reserve                                                   | 29.23           | 118.40           |
| Banna          | Xishuangbanna Tropical<br>Rainforest                                         | 21.92           | 101.27           |

151

152

153

154

**Table S2** Information of four sites with observations of eddy covariance data

| <b>Site ID</b> | <b>Site Name</b>                                                            | <b>Latitude</b> | <b>Longitude</b> |
|----------------|-----------------------------------------------------------------------------|-----------------|------------------|
| AU-Rob         | Robson Creek, Queensland,<br>Australia Forest Ecosystem Research<br>Station | -17.12          | 145.63           |
| BR-Sa1         | Santarem-Km67-Primary Forest<br>Ecosystem Research Station                  | -2.86           | -54.96           |
| BR-Sa3         | Santarem-Km83-Logged Forest<br>Ecosystem Research Station                   | -3.02           | -54.97           |
| GF-Guy         | Guyaflux (French Guiana) Forest<br>Ecosystem Research Station               | 5.28            | -52.92           |

155

156

157

158 **Table S3** Inputting gridded datasets to calculate the net rate of CO<sub>2</sub> assimilation (A<sub>n</sub>) in  
 159 Figure 2.

| <b>Name<br/>abbr.</b> | <b>Datasets Name</b>                                                                                             | <b>Source</b> | <b>Spatial-<br/>resolution</b> | <b>Time-<br/>resolution</b> | <b>During</b>     |
|-----------------------|------------------------------------------------------------------------------------------------------------------|---------------|--------------------------------|-----------------------------|-------------------|
| T <sub>air</sub>      | temperature                                                                                                      | ERA5-Land     | 0.1deg                         | monthly                     | 195001-<br>202112 |
| VPD                   | vapor pressure<br>deficit                                                                                        | ERA Interim   | 0.125deg                       | monthly                     | 198201-<br>201812 |
| SW                    | downward short<br>wave radiation                                                                                 | BESS          | 0.05deg                        | daily                       | 200101-<br>201912 |
| RTSIF                 | sun-induced<br>chlorophyll<br>fluorescence                                                                       | TROPOMI-SIF   | 0.05deg                        | 8days                       | 200101-<br>201812 |
| GOSIF<br>GPP          | gross primary<br>production<br>derived from<br>OCO-2 Solar-<br>induced<br>chlorophyll<br>fluorescence<br>(GOSIF) | OCO-2 SIF     | 0.05deg                        | monthly                     | 200001-<br>202212 |
| FLUXCOM<br>GPP        | gross primary<br>production<br>based on eddy<br>covariance flux<br>tower<br>measurements                         | FLUXCOM       | 0.5deg                         | monthly                     | 198001-<br>201312 |

160

161 **Table S4 -part1** Equations for calculating  $A_n$ ,  $W_c$ ,  $W_j$  and  $W_p$  and intermediate variables in  
 162 Figure 2.

| Equations                                                                                                                                                                                          | Notes                                                                                                                                                                                                   | Ref.                                          |
|----------------------------------------------------------------------------------------------------------------------------------------------------------------------------------------------------|---------------------------------------------------------------------------------------------------------------------------------------------------------------------------------------------------------|-----------------------------------------------|
| $A_n = \min \{w_c, w_j, w_p\} - R_{dark}$                                                                                                                                                          | Net carbon assimilation rate ( $A_n$ , $\mu\text{mol}/\text{m}^2/\text{s}$ ).                                                                                                                           | Farquhar et al., 1980; Bernacchi et al., 2013 |
| $w_c = V_{c_{\max}} \times \frac{c_i - \Gamma^*}{c_i + K_C \times (1 + \frac{O}{K_O})}$                                                                                                            | Rubisco-limited photosynthetic rate ( $w_c$ , $\mu\text{mol}/\text{m}^2/\text{s}$ )                                                                                                                     | Farquhar et al., 1980                         |
| $w_j = J \times \frac{c_i - \Gamma^*}{4 \times (c_i + 2 \times \Gamma^*)}$                                                                                                                         | Electron-transport limited rate of photosynthetic rate ( $w_j$ , $\mu\text{mol}/\text{m}^2/\text{s}$ )                                                                                                  | Farquhar et al., 1980                         |
| $J = \frac{J_e + J_{\max} - \sqrt{(J_e + J_{\max})^2 - 4 \times \Theta \times J_e \times J_{\max}}}{2 \times \Theta}$                                                                              | The rate of electrons through the thylakoid membrane ( $\mu\text{mol}/\text{m}^2/\text{s}$ )                                                                                                            | Farquhar et al., 1980; Bernacchi et al., 2013 |
| $J_e = PAR_{total} \times \alpha \times \beta \times \Phi_{PSII}$                                                                                                                                  | The rate of whole electron transport provided by light ( $\mu\text{mol}/\text{m}^2/\text{s}$ ).                                                                                                         | Bernacchi et al., 2013                        |
| $w_p = 0.5 \times V_{c_{\max}}$                                                                                                                                                                    | Triose phosphate export limited rate of photosynthesis ( $\mu\text{mol}/\text{m}^2/\text{s}$ )                                                                                                          | Ryu et al., 2011                              |
| $Para = Para_{25} \times \exp(\frac{(T_K - 298.15) \times \Delta H_{para}}{R \times T_K \times 298.15})$                                                                                           | Temperature dependence function for various parameters including $K_C$ , $K_O$ , $\Gamma^*$ , $R_{dark}$ and $V_{c_{\max}}$ . $T_K$ denotes leaf temperature in Kelvin. Reference temperature is 25 °C. | Bernacchi et al., 2013                        |
| $J_{\max} = J_{\max,25} \times \exp((\frac{25 - T_{opt}}{\Omega_T})^2 - (\frac{T_K - 273.15 - T_{opt}}{\Omega_T})^2)$                                                                              | Temperature dependence function for maximum electron transport rate ( $J_{\max}$ ). $T_{opt}$ is the optimal temperature for $J_{\max}$ .                                                               | Bernacchi et al., 2013; June et al., 2004     |
| $g_s = 1.6 \times (1 + \frac{g_1}{\sqrt{VPD}}) \times \frac{A_n}{c_a}$<br>$A_n = g_s \times (c_a - c_i)$<br>$\Rightarrow c_i = c_a \times (1 - \frac{1}{1.6 \times (1 + \frac{g_1}{\sqrt{VPD}})})$ | Use optimal stomatal model to estimate internal $\text{CO}_2$ concentration ( $c_i$ ) from atmospheric $\text{CO}_2$ concentration ( $c_a$ ) and vapor pressure deficit (VPD)                           | Lin et al., 2015; Medlyn et al., 2011         |

163

164 **Table S4 -part2** Equations for calculating  $A_n$ ,  $W_c$ ,  $W_j$  and  $W_p$  and intermediate variables in  
 165 Figure 2.

| Symbol/Equations                                                                         | Notes                                                                                                                                                                          | Ref.                                                            |
|------------------------------------------------------------------------------------------|--------------------------------------------------------------------------------------------------------------------------------------------------------------------------------|-----------------------------------------------------------------|
| $c_a = 380$                                                                              | Atmospheric CO <sub>2</sub> concentration (ppm)                                                                                                                                |                                                                 |
| $g_1 = 3.77$                                                                             | Coefficient in stomatal conductance scheme                                                                                                                                     | Lin et al., 2015                                                |
| $J_{\max,25} = 1.67 \times V_{c\max,25}$                                                 | Maximum electron transport rate ( $\mu\text{mol}/\text{m}^2/\text{s}$ ) at 25 °C                                                                                               | Medlyn et al., 2002                                             |
| $O = 210$                                                                                | Atmospheric O <sub>2</sub> concentration (pp thousand)                                                                                                                         |                                                                 |
| $R = 8.314$                                                                              | Universal gas constant (J/K/mol)                                                                                                                                               |                                                                 |
| $T_{opt} = 35$                                                                           | Optimal temperature for $J_{\max}$ (°C)                                                                                                                                        | Lloyd and Farquhar, 2008                                        |
| $K_{C,25} = 404.9$<br>$\Delta H_{K_C} = 79.43$                                           | Michaelis-Menton constant for carboxylase ( $\mu\text{mol}/\text{mol}$ ) at 25 °C and activation energy for temperature dependence (kJ/mol)                                    | Bernacchi et al., 2001                                          |
| $K_{O,25} = 278.4$<br>$\Delta H_{K_O} = 36.38$                                           | Michaelis-Menton constant for oxygenase (mmol/mol) at 25 °C and activation energy for temperature dependence (kJ/mol)                                                          | Bernacchi et al., 2001                                          |
| $R_{\text{dark},25} = 0.015 \times V_{c\max,25}$<br>$\Delta H_{R_{\text{dark}}} = 46.39$ | Leaf dark respiration ( $\mu\text{mol}/\text{m}^2/\text{s}$ ) at 25 °C and activation energy for temperature dependence (kJ/mol)                                               | Bernacchi et al., 2001                                          |
| $V_{c\max,25}$<br>$\Delta H_{V_{c\max}} = 65.33$                                         | Maximum carboxylation rate ( $\mu\text{mol}/\text{m}^2/\text{s}$ ) at 25 °C is acquired from observations. Its activation energy for temperature dependence (kJ/mol) is listed | Bernacchi et al., 2001                                          |
| $\Gamma_{25}^* = 42.75$<br>$\Delta H_{\Gamma^*} = 38.83$                                 | CO <sub>2</sub> compensation point ( $\mu\text{mol}/\text{mol}$ ) at 25 °C and activation energy for temperature dependence (kJ/mol)                                           | Bernacchi et al., 2001                                          |
| $\alpha = 0.85$                                                                          | Leaf absorbance fraction of photosynthetically active radiation (PAR)                                                                                                          | Farquhar et al., 1980; Bernacchi et al., 2013                   |
| $\beta = 0.5$                                                                            | Fraction of PAR that reaches PSII system                                                                                                                                       | Farquhar et al., 1980; Bernacchi et al., 2013                   |
| $\Phi_{PSII} = 0.85$                                                                     | Maximum quantum efficiency of PSII photochemistry.                                                                                                                             | Bernacchi et al., 2003; Evans, 1989; von Caemmerer et al., 2000 |
| $\Theta = 0.7$                                                                           | Convexity of light-response curve.                                                                                                                                             | Bernacchi et al., 2003; Evans, 1989; Ögren and Evans, 1993      |
| $\Omega_T = 11.6 + 0.18 \times T_{opt}$                                                  | Coefficient for the temperature function of $J_{\max}$ . $T_{opt}$ is optimal temperature for $J_{\max}$ (°C)                                                                  | Bernacchi et al., 2003                                          |

166



167 **Table S4 -part3** Equations for calculating  $An$ ,  $W_c$ ,  $W_j$  and  $W_p$  and intermediate variables in  
 168 Figure 2.  
 169 Equations to calculate radiative transfer within canopy with a total leaf area index as  $LAI_{total}$ .

| Equations                                                                                                                                                                                       | Notes                                                                | Ref.                                                          |
|-------------------------------------------------------------------------------------------------------------------------------------------------------------------------------------------------|----------------------------------------------------------------------|---------------------------------------------------------------|
| $PAR_{total} = (1 - \rho_{cb}) \times PAR_{b,0} \times (1 - \exp(-k'_b \times CI \times LAI_{total})) + (1 - \rho_{cd}) \times PAR_{d,0} \times (1 - \exp(-k'_d \times CI \times LAI_{total}))$ | Total PAR absorbed by canopy ( $\mu\text{mol}/\text{m}^2/\text{s}$ ) | He et al., 2012; Ryu et al., 2011; De Pury and Farquhar, 1997 |
| $k'_b = \frac{0.46}{\cos(SZA)}$                                                                                                                                                                 | Extinction coefficient for beam and scattered beam PAR               | De Pury and Farquhar, 1997                                    |
| $k'_d = 0.719$                                                                                                                                                                                  | Extinction coefficient for diffuse and scattered diffuse PAR         | De Pury and Farquhar, 1997                                    |
| $\rho_{cb} = 0.029$                                                                                                                                                                             | Canopy reflection coefficient for beam PAR                           | De Pury and Farquhar, 1997                                    |
| $\rho_{cd} = 0.036$                                                                                                                                                                             | Canopy reflection coefficient for diffuse PAR                        | De Pury and Farquhar, 1997                                    |
| $CI = 0.63$                                                                                                                                                                                     | Leaf clumping index                                                  | He et al., 2012; Ryu et al., 2011                             |

170

171 **Table S4 -part4** Equations for calculating  $An$ ,  $W_c$ ,  $W_j$  and  $W_p$  and intermediate variables in  
 172 Figure 2.  
 173 Equations to calculate incoming photosynthetically active radiation in beam ( $PAR_{b,0}$ ) and in  
 174 diffuse ( $PAR_{d,0}$ ) over canopy.  $R_{short}$  denotes total short-wave radiations from BESS SW.  $P$   
 175 denotes observed air pressure and  $P_0$  denotes standard air pressure.

| Equations                                                                                                                                                                                                                                          | Notes                                                                                                                             | Ref.                   |
|----------------------------------------------------------------------------------------------------------------------------------------------------------------------------------------------------------------------------------------------------|-----------------------------------------------------------------------------------------------------------------------------------|------------------------|
| $PAR_{b,0} = R_{short} \times f_{PAR} \times f_{PAR,b}$ $PAR_{d,0} = R_{short} \times f_{PAR} \times (1 - f_{PAR,b})$                                                                                                                              | The canopy top photosynthetically active radiation in beam ( $PAR_{b,0}$ ) and diffuse ( $PAR_{d,0}$ ) light                      | Weiss and Norman, 1985 |
| $f_{PAR} = \frac{R_{b,vis} + R_{d,vis}}{R_{b,nir} + R_{d,nir} + R_{b,vis} + R_{d,vis}}$ $f_{PAR,b} = \frac{R_{b,vis}}{R_{b,vis} + R_{d,vis}}$ $\times (1 - (\frac{0.9 - \frac{R_{short}}{R_{b,nir} + R_{d,nir} + R_{b,vis} + R_{d,vis}}}{0.7})^2)$ | The fraction of total PAR over total incoming radiation ( $f_{PAR}$ ) and the fraction of beam PAR over total PAR ( $f_{PAR,b}$ ) | Weiss and Norman, 1985 |
| $R_{b,vis} = \frac{600 \times e^{-0.185 \times \frac{P}{P_0} \times m}}{m}$                                                                                                                                                                        | Expected beam visible radiation under clear sky ( $W/m^2$ )                                                                       | Weiss and Norman, 1985 |
| $R_{d,vis} = \frac{0.4 \times (600 - R_{b,vis} \times m)}{m}$                                                                                                                                                                                      | Expected diffuse visible radiation under clear sky ( $W/m^2$ )                                                                    | Weiss and Norman, 1985 |
| $R_{b,nir} = \frac{720 \times e^{-0.06 \times \frac{P}{P_0} \times m} - w}{m}$                                                                                                                                                                     | Expected beam near-infrared radiation under clear sky ( $W/m^2$ )                                                                 | Weiss and Norman, 1985 |
| $R_{d,nir} = \frac{0.6 \times (720 - R_{b,nir} \times m - w)}{m}$                                                                                                                                                                                  | Expected diffuse near-infrared radiation under clear sky ( $W/m^2$ )                                                              | Weiss and Norman, 1985 |
| $w = 1320 \times 10^{-1.195 + 0.4459 \times \log_{10} m - 0.0345 \times (\log_{10} m)^2}$                                                                                                                                                          | Expected water absorbance of near-infrared radiation in the atmosphere ( $W/m^2$ )                                                | Weiss and Norman, 1985 |
| $m = \cos(SZA)^{-1}$                                                                                                                                                                                                                               | Parameter calculated from solar zenith angle (SZA)                                                                                | Weiss and Norman, 1985 |

176

**Table S5.** Information of total LAI mean values from previously published literatures.

| <b>NO.</b> | <b>LAI mean</b> | <b>Sites</b>             | <b>Methods</b> | <b>Ref.</b>              |
|------------|-----------------|--------------------------|----------------|--------------------------|
| 1          | 6.0             | ORCHIDEE TrBE module     | Module         | De Weirdt et al., 2012   |
| 2          | 5.88            | K34                      | observation    | Wu et al., 2016          |
| 3          | 5.45            | Tapajo's National Forest | observation    | Asner et al., 2003       |
| 4          | 6.04            | Barro Colorado Island    | observation    | Wirth et al., 2001       |
| 5          | 6.0             | Costa Rican Forest       | observation    | Clark et al., 2008;      |
| 6          | 5.89            | K67                      | observation    | Wu et al., 2016          |
| 7          | 5.9             | Tapajo's National Forest | observation    | Brando et al., 2008      |
| 8          | 5.7             | K67                      | observation    | Smith et al., 2019       |
| 9          | 5.34            | Congo                    | observation    | de Wasseige et al., 2003 |
| 10         | 5.93            | Xishuangbanna            | observation    | Li et al., 2010          |
| 11         | 5.67            | Dinghushan               | observation    | Zhao, Chen et al., 2020  |

179 **Table S6.** Information of 53 sites with ground-based observations of seasonal litterfall data.

| Site | Latitude | Longitude | Reference                        |
|------|----------|-----------|----------------------------------|
| 1    | 15.50    | -90.45    | Kunkel-Westphal and Kunkel, 1979 |
| 2    | -2.61    | -60.21    | Pastorello et al., 2020          |
| 3    | -2.85    | -54.95    | Pastorello et al., 2020          |
| 4    | -0.45    | -51.70    | Barlow et al., 2007              |
| 5    | -1.73    | -47.15    | Dantas and Phillipson, 1989      |
| 6    | 6.85     | 4.35      | Hopkins, 1966                    |
| 7    | 7.48     | 4.57      | Odiwe and Muoghalu, 2003         |
| 8    | 5.70     | 6.20      | Ndakara, 2011                    |
| 9    | 4.57     | 9.45      | Songwe and Fasehun, 1995         |
| 10   | 4.37     | 9.27      | Songwe and Fasehun, 1995         |
| 11   | 0.51     | 12.80     | Midoko Iponga et al., 2019       |
| 12   | 8.48     | 77.28     | Sundarapandian and Swamy, 1999   |
| 13   | 8.47     | 77.36     | Sundarapandian and Swamy, 1999   |
| 14   | 21.93    | 101.27    | CERN                             |
| 15   | 14.50    | 101.92    | Yamashita et al., 2010           |
| 16   | 22.13    | 106.82    | Lu et al., 2008                  |
| 17   | 21.93    | 108.35    | Wu, 1991                         |
| 18   | 22.97    | 108.35    | Rong, 2009                       |
| 19   | 23.01    | 108.59    | Zeng, 2011                       |
| 20   | 19.12    | 109.95    | Wang, 2007                       |
| 21   | 21.08    | 110.17    | Ren et al., 1998                 |
| 22   | 21.85    | 111.02    | Ren et al., 1998                 |
| 23   | 23.47    | 111.87    | Chen and Wang, 1992              |
| 24   | 22.68    | 112.90    | Zou et al., 2006                 |
| 25   | 22.68    | 112.90    | CERN                             |
| 26   | 26.10    | 117.20    | Wu, 2006                         |
| 27   | 24.33    | 117.43    | Pan et al., 2010                 |
| 28   | 26.19    | 117.43    | Yang et al., 2003                |
| 29   | 27.70    | 117.68    | Lin et al., 1999                 |
| 30   | 24.77    | 117.86    | Liu et al., 2009                 |

|    |        |        |                                |
|----|--------|--------|--------------------------------|
| 31 | 24.77  | 117.86 | Tang, 2010                     |
| 32 | 26.47  | 117.95 | Zheng et al., 2011             |
| 33 | 4.97   | 117.80 | Burghouts et al., 1992         |
| 34 | -1.52  | 120.03 | Triadiati et al., 2011         |
| 35 | -27.33 | 152.75 | Hegarty, 1991                  |
| 36 | -11.42 | -55.33 | Zhang et al., 2014             |
| 37 | -2.85  | -54.95 | Rice et al., 2004              |
| 38 | 4.79   | -74.20 | Zhang et al., 2014             |
| 39 | 5.45   | -61.88 | Zhang et al., 2014             |
| 40 | -1.00  | -52.00 | Zhang et al., 2014             |
| 41 | -3.01  | -54.97 | Melton et al., 2014            |
| 42 | -2.00  | -54.00 | Zhang et al., 2014             |
| 43 | -4.33  | -62.47 | Zhang et al., 2014             |
| 44 | -2.57  | -60.12 | Wu et al., 2016                |
| 45 | 5.27   | -52.92 | De Weirdt et al., 2012         |
| 46 | 7.20   | -75.34 | Zhang et al., 2014             |
| 47 | -11.42 | -55.33 | Zhang et al., 2014             |
| 48 | 6.22   | -5.03  | Zhang et al., 2014             |
| 49 | -23.14 | -44.18 | Silva-Filho et al., 2006       |
| 50 | -21.02 | -40.92 | Jackson, 1978                  |
| 51 | 9.38   | -79.96 | Unpublished data, S. J. Wright |
| 52 | -23.18 | -46.87 | Morellato, 1992                |
| 53 | -25.18 | -48.30 | Scheer et al., 2009            |

180

181

182 **Table S7.** Information of data quality control (QC) for the Lad-LAI product

| QC class     | QC value | RSS | RMSE (m <sup>2</sup> m <sup>-2</sup> ) |
|--------------|----------|-----|----------------------------------------|
| Best         | 1        | 0-1 | 0-1                                    |
| Good         | 2        | 1-4 | 1-2                                    |
| Acceptable   | 3        | 4-9 | 2-3                                    |
| Cautious use | 4        | >9  | >3                                     |

183

184

185 **References:**

- 186 Asner, G.P., Scurlock, J.M.O. and A. Hicke, J.: Global synthesis of leaf area index  
187 observations: implications for ecological and remote sensing studies, *Global Ecol.*  
188 *Biogeogr.*, 12, 191-205, 10.1046/j.1466-822X.2003.00026.x, 2003.
- 189 Barlow, J., Gardner, T. A., Ferreira, L. V., and Peres, C. A.: Litter fall and decomposition in  
190 primary, secondary and plantation forests in the Brazilian Amazon, *Forest Ecol. Manag.*,  
191 247, 91-97, 10.1016/j.foreco.2007.04.017, 2007.
- 192 Bernacchi, C. J., Singaas, E. L., Pimentel, C., Portis Jr, A. R., and Long, S. P.: Improved  
193 temperature response functions for models of Rubisco-limited photosynthesis, *Plant,*  
194 *Cell Environ.*, 24, 253-259, 10.1111/j.1365-3040.2001.00668.x, 2001.
- 195 Bernacchi, C. J., Pimentel, C., and Long, S. P.: In vivo temperature response functions of  
196 parameters required to model RuBP-limited photosynthesis, *Plant, Cell Environ.*, 26,  
197 1419-1430, 10.1046/j.0016-8025.2003.01050.x, 2003.
- 198 Bernacchi, C. J., Bagley, J. E., Serbin, S. P., Ruiz-Vera, U. M., Rosenthal, D. M., and  
199 Vanloocke, A.: Modelling C<sub>3</sub> photosynthesis from the chloroplast to the ecosystem,  
200 *Plant, Cell Environ.*, 36, 1641-1657, 10.1111/pce.12118, 2013.
- 201 Brando, P. M., Nepstad, D. C., Davidson, E. A., Trumbore, S. E., Ray, D. and Camargo, P.:  
202 Drought effects on litterfall, wood production and belowground carbon cycling in an  
203 Amazon forest: Results of a throughfall reduction experiment, *Philos. T. R. Soc. B.*, 363,  
204 1839-1848, 10.1098/rstb.2007.0031, 2008.
- 205 Burghouts, T., Ernsting, G., Korthals, G., and Vries, T. D.: Litterfall, leaf litter decomposition  
206 and litter invertebrates in primary and selectively logged dipterocarp forest in Sabah,  
207 Malaysia, *Philos. T. R. Soc. B.*, 335, 407-416, 10.1098/rstb.1992.0032, 1992.
- 208 Chinese Ecosystem Research Network (CERN): <http://www.cern.org.cn>, last access: 13  
209 November 2022.
- 210 Chen, X., Huang, Y., Nie, C., Zhang, S., Wang, G., Chen, S., and Chen, Z.: A long-term  
211 reconstructed TROPOMI solar-induced fluorescence dataset using machine learning  
212 algorithms, *Sci. Data*, 9, 427, 10.1038/s41597-022-01520-1, 2022.
- 213 Chen, Z. H., Zhang, H. T., and Wang, B. S.: Studies on biomass and production of the lower  
214 subtropical evergreen broad-leaved forest in Heishiding Natural Reserve, VII. Litterfall,  
215 litter standing crop and litter decomposition rate, *Journal of Tropical and Subtropical*  
216 *Botany*, 107-114, <http://europepmc.org/abstract/CBA/539457>, 1992.
- 217 Clark, D.B., Olivas, P.C., Oberbauer, S.F., Clark, D.A. and Ryan, M.G.: First direct  
218 landscape-scale measurement of tropical rain forest Leaf Area Index, a key driver of  
219 global primary productivity, *Ecol. Lett.*, 11, 163-172, 10.1111/j.1461-  
220 0248.2007.01134.x, 2008.

221 Dantas, M. and Phillipson, J.: Litterfall and litter nutrient content in primary and secondary  
 222 Amazonian ‘terra firme’ rain forest, *J. Trop. Ecol.*, 5, 27-36,  
 223 10.1017/s0266467400003199, 1989.

224 De Pury, D. G. G. and Farquhar, G. D.: Simple scaling of photosynthesis from leaves to  
 225 canopies without the errors of big-leaf models, *Plant, Cell Environ.*, 20, 537-557,  
 226 10.1111/j.1365-3040.1997.00094.x, 1997.

227 de Wasseige, C., Bastin, D. and Defourny, P.: Seasonal variation of tropical forest LAI based  
 228 on field measurements in Central African Republic, *Agr. Forest Meteorol.*, 119, 181-  
 229 194, 10.1016/S0168-1923(03)00138-2, 2003.

230 De Weirdt, M., Verbeeck, H., Maignan, F., Peylin, P., Poulter, B., Bonal, D., Ciais, P., and  
 231 Steppe, K.: Seasonal leaf dynamics for tropical evergreen forests in a process-based  
 232 global ecosystem model, *Geosci. Model Dev.*, 5, 1091-1108, 10.5194/gmd-5-1091-2012,  
 233 2012.

234 Dee, D. P., Uppala, S. M., Simmons, A. J., Berrisford, P., Poli, P., Kobayashi, S., Andrae, U.,  
 235 Balmaseda, M. A., Balsamo, G., Bauer, P., Bechtold, P., Beljaars, A. C. M., van de Berg,  
 236 L., Bidlot, J., Bormann, N., Delsol, C., Dragani, R., Fuentes, M., Geer, A. J.,  
 237 Haimberger, L., Healy, S. B., Hersbach, H., Hólm, E. V., Isaksen, L., Kållberg, P.,  
 238 Köhler, M., Matricardi, M., McNally, A. P., Monge-Sanz, B. M., Morcrette, J. J., Park,  
 239 B. K., Peubey, C., de Rosnay, P., Tavolato, C., Thépaut, J. N., and Vitart, F.: The ERA-  
 240 Interim reanalysis: configuration and performance of the data assimilation system, *Q. J.*  
 241 *Roy. Meteor. Soc.*, 137, 553-597, 10.1002/qj.828, 2011.

242 Evans, J. R.: Photosynthesis and Nitrogen Relationships in Leaves of C<sub>3</sub> Plants, *Oecologia*,  
 243 78, 9-19, [jstor.org/stable/4218825](http://jstor.org/stable/4218825), 1989.

244 Farquhar, G. D., von Caemmerer, S., and Berry, J. A.: A biochemical model of photosynthetic  
 245 CO<sub>2</sub> assimilation in leaves of C<sub>3</sub> species, *Planta*, 149, 78-90, 10.1007/BF00386231,  
 246 1980.

247 He, L., Chen, J. M., Pisek, J., Schaaf, C. B., and Strahler, A. H.: Global clumping index map  
 248 derived from the MODIS BRDF product, *Remote Sens. Environ.*, 119, 118-130,  
 249 10.1016/j.rse.2011.12.008, 2012.

250 Hegarty, E. E.: Leaf litter production by lianes and trees in a sub-tropical Australian rain  
 251 forest, *J. Trop. Ecol.*, 7, 201-214, 10.1017/s0266467400005356, 1991.

252 Hopkins, B.: Vegetation of the Olokemeji Forest Reserve, Nigeria: IV. The litter and soil with  
 253 special reference to their seasonal changes, *J. Ecol.*, 54, 10.2307/2257811, 1966.

254 Jackson, F. J.: Seasonality of flowering and leaf-fall in a Brazilian subtropical lower montane  
 255 moist forest, *Biotropica*, 10, 38-42, 10.2307/2388103, 1978.

256 June, T., Evans, J. R., and Farquhar, G. D.: A simple new equation for the reversible  
257 temperature dependence of photosynthetic electron transport: a study on soybean leaf,  
258 *Funct. Plant Biol.*, 31, 275-283, 10.1071/FP03250, 2004.

259 Jung, M., Koirala, S., Weber, U., Ichii, K., Gans, F., Camps-Valls, G., Papale, D., Schwalm,  
260 C., Tramontana, G., and Reichstein, M.: The FLUXCOM ensemble of global land-  
261 atmosphere energy fluxes, *Sci. Data*, 6, 74. 10.1038/s41597-019-0076-8, 2019.

262 Kunkel-Westphal, I. and Kunkel, P.: Litterfall in a guatemalan primary forest, with details of  
263 leaf-shedding by some common tree species, *J. Ecol.*, 67, 10.2307/2259119, 1979.

264 Li, X., and Xiao, J.: Mapping photosynthesis solely from solar-induced chlorophyll  
265 fluorescence: A global, fine-resolution dataset of gross primary production derived from  
266 OCO-2, *Remote Sens.*, 11, 2563, 10.3390/rs11212563, 2019.

267 Li, Z., Zhang, Y., Wang, S., Yuan, G., Yang, Y. and Cao, M.: Evapotranspiration of a tropical  
268 rain forest in Xishuangbanna, southwest China, *Hydrol. Process.*, 24, 2405-2416,  
269 10.1002/hyp.7643, 2010.

270 Lin, Y.-S., Medlyn, B. E., Duursma, R. A., Prentice, I. C., Wang, H., Baig, S., Eamus, D., de  
271 Dios, Victor R., Mitchell, P., Ellsworth, D. S., de Beck, M. O., Wallin, G., Uddling, J.,  
272 Tarvainen, L., Linderson, M.-L., Cernusak, L. A., Nippert, J. B., Ocheltree, T. W.,  
273 Tissue, D. T., Martin-StPaul, N. K., Rogers, A., Warren, J. M., De Angelis, P.,  
274 Hikosaka, K., Han, Q., Onoda, Y., Gimeno, T. E., Barton, C. V. M., Bennie, J., Bonal,  
275 D., Bosc, A., Löw, M., Macinins-Ng, C., Rey, A., Rowland, L., Setterfield, S. A., Tausz-  
276 Posch, S., Zaragoza-Castells, J., Broadmeadow, M. S. J., Drake, J. E., Freeman, M.,  
277 Ghannoum, O., Hutley, Lindsay B., Kelly, J. W., Kikuzawa, K., Kolari, P., Koyama, K.,  
278 Limousin, J.-M., Meir, P., Lola da Costa, A. C., Mikkelsen, T. N., Salinas, N., Sun, W.,  
279 and Wingate, L.: Optimal stomatal behaviour around the world, *Nat. Clim. Change*, 5,  
280 459-464, 10.1038/nclimate2550, 2015.

281 Lin, Y., He, J., Yang, Z., Liu, C., Lin, P., and Li, Z.: Yield and dynamics of litter in  
282 *Castanopsis chinensis* community in Wuyi Mountains, *Journal of Xiamen University*  
283 (Natural Science), 128-134, 1999. (in Chinese)

284 Liu, W., Fan, H., Gao, C., Huang, R., and Su, B.: Litter mass and nutrient flux in Eucalyptus  
285 plantation in continuous age series, *J. Ecol.*, 28, 1928-1934, 2009. (in Chinese)

286 Lloyd, J. and Farquhar, G. D.: Effects of rising temperatures and [CO<sub>2</sub>] on the physiology of  
287 tropical forest trees, *Philos. T. R. Soc. B.*, 363, 1811-1817, 10.1098/rstb.2007.0032,  
288 2008.

289 Lu, L., Jia, H., He, R., Li, J., and Tan, S.: A preliminary study on litter falls of six kinds of  
290 plantations in the tropical South Asia, *Forestry Science Research*, 21, 346-352, 2008. (in  
291 Chinese)



292 Medlyn, B. E., Duursma, R. A., Eamus, D., Ellsworth, D. S., Prentice, I. C., Barton, C. V. M.,  
 293 Crous, K. Y., De Angelis, P., Freeman, M., and Wingate, L.: Reconciling the optimal  
 294 and empirical approaches to modelling stomatal conductance, *Glob. Change Biol.*, 17,  
 295 2134-2144, 10.1111/j.1365-2486.2010.02375.x, 2011.

296 Medlyn, B. E., Dreyer, E., Ellsworth, D., Forstreuter, M., Harley, P. C., Kirschbaum, M. U.  
 297 F., Le Roux, X., Montpied, P., Strassmeyer, J., Walcroft, A., Wang, K., and Loustau,  
 298 D.: Temperature response of parameters of a biochemically based model of  
 299 photosynthesis. II. A review of experimental data, *Plant, Cell Environ.*, 25, 1167-1179,  
 300 10.1046/j.1365-3040.2002.00891.x, 2002.

301 Melton, J., Shrestha, R., and Arora, V.: The influence of soils on heterotrophic respiration  
 302 exerts a strong control on net ecosystem productivity in seasonally dry Amazonian  
 303 forests, *Biogeosciences*, 11, 1151-1168, 10.5194/bgd-11-12487-2014, 2014.

304 Midoko Iponga, D., Mpikou, R. G. J., Loumeto, J., and Picard, N.: The effect of different  
 305 anthropogenic disturbances on litterfall of a dominant pioneer rain forest tree in Gabon,  
 306 *Afr. J. Ecol.*, 58, 281-290, 10.1111/aje.12696, 2019.

307 Morellato, C. P.: Nutrient cycling in two south-east brazilian forests. I litterfall and litter  
 308 standing crop, *J. Trop. Ecol.*, 8, 205-215, 10.1017/S0266467400006362, 1992.

309 Muñoz-Sabater, J., Dutra, E., Agustí-Panareda, A., Albergel, C., Arduini, G., Balsamo, G.,  
 310 Boussetta, S., Choulga, M., Harrigan, S., Hersbach, H., Martens, B., Miralles, D. G.,  
 311 Piles, M., Rodríguez-Fernández, N. J., Zsoter, E., Buontempo, C., and Thépaut, J.-N.:  
 312 ERA5-Land: a state-of-the-art global reanalysis dataset for land applications, *Earth. Syst.*  
 313 *Sci. Data*, 13, 4349-4383, 10.5194/essd-13-4349-2021, 2021.

314 Ndakara, O. E.: Litterfall and nutrient returns in isolated stands of persea gratissima (avocado  
 315 pear) in the rainforest zone of southern Nigeria, *Ethiopian Journal of Environmental*  
 316 *Studies and Management*, 4, 10.4314/ejesm.v4i3.6, 2011.

317 Odiwe, A. I. and Muoghalu, J. I.: Litterfall dynamics and forest floor litter as influenced by  
 318 fire in a secondary lowland rain forest in Nigeria, *Trop. Ecol.*, 44, 241-249, 2003.

319 Ögren E. and Evans J.R.: Photosynthetic light-response curves. I. The influence of CO<sub>2</sub>  
 320 partial pressure and leaf inversion, *Planta*, 189, 180-190, 1993.

321 Pan, H., Huang, S., Hong, W., Zhao, K., and Zhang, Z.: Litter mass and carbon return  
 322 dynamics of three species of Acacia plantation, *Journal of Fujian Forestry University*,  
 323 30, 104-108, 10.13324/j.cnki.jfcf.2010.02.013, 2010. (in Chinese)

324 Pastorello, G., Trotta, C., Canfora, E., Chu, H., Christianson, D., Cheah, Y. W., Poindexter,  
 325 C., Chen, J., Elbashandy, A., Humphrey, M., Isaac, P., Polidori, D., Reichstein, M.,  
 326 Ribeca, A., van Ingen, C., Vuichard, N., Zhang, L., Amiro, B., Ammann, C., Arain, M.  
 327 A., Ardo, J., Arkebauer, T., Arndt, S. K., Arriga, N., Aubinet, M., Aurela, M., Baldocchi,  
 328 D., Barr, A., Beamesderfer, E., Marchesini, L. B., Bergeron, O., Beringer, J., Bernhofer,

329 C., Berveiller, D., Billesbach, D., Black, T. A., Blanken, P. D., Bohrer, G., Boike, J.,  
330 Bolstad, P. V., Bonal, D., Bonnefond, J. M., Bowling, D. R., Bracho, R., Brodeur, J.,  
331 Brummer, C., Buchmann, N., Burban, B., Burns, S. P., Buysse, P., Cale, P., Cavagna,  
332 M., Cellier, P., Chen, S., Chini, I., Christensen, T. R., Cleverly, J., Collalti, A., Consalvo,  
333 C., Cook, B. D., Cook, D., Coursolle, C., Cremonese, E., Curtis, P. S., D'Andrea, E., da  
334 Rocha, H., Dai, X., Davis, K. J., Cinti, B., Grandcourt, A., Ligne, A., De Oliveira, R. C.,  
335 Delpierre, N., Desai, A. R., Di Bella, C. M., Tommasi, P. D., Dolman, H., Domingo, F.,  
336 Dong, G., Dore, S., Duce, P., Dufrene, E., Dunn, A., Dusek, J., Eamus, D., Eichelmann,  
337 U., ElKhidir, H. A. M., Eugster, W., Ewenz, C. M., Ewers, B., Famulari, D., Fares, S.,  
338 Feigenwinter, I., Feitz, A., Fensholt, R., Filippa, G., Fischer, M., Frank, J., Galvagno,  
339 M., Gharun, M., Gianelle, D., Gielen, B., Gioli, B., Gitelson, A., Goded, I., Goeckede,  
340 M., Goldstein, A. H., Gough, C. M., Goulden, M. L., Graf, A., Griebel, A., Gruening, C.,  
341 Grunwald, T., Hammerle, A., Han, S., Han, X., Hansen, B. U., Hanson, C., Hatakka, J.,  
342 He, Y., Hehn, M., Heinesch, B., Hinko-Najera, N., Hortnagl, L., Hutley, L., Ibrom, A.,  
343 Ikawa, H., Jackowicz-Korczynski, M., Janous, D., Jans, W., Jassal, R., Jiang, S., Kato,  
344 T., Khomik, M., Klatt, J., Knohl, A., Knox, S., Kobayashi, H., Koerber, G., Kolle, O.,  
345 Kosugi, Y., Kotani, A., Kowalski, A., Kruijt, B., Kurbatova, J., Kutsch, W. L., Kwon,  
346 H., Launiainen, S., Laurila, T., Law, B., Leuning, R., Li, Y., Liddell, M., Limousin, J.  
347 M., Lion, M., Liska, A. J., Lohila, A., Lopez-Ballesteros, A., Lopez-Blanco, E., Loubet,  
348 B., Loustau, D., Lucas-Moffat, A., Luers, J., Ma, S., Macfarlane, C., Magliulo, V.,  
349 Maier, R., Mammarella, I., Manca, G., Marcolla, B., Margolis, H. A., Marras, S.,  
350 Massman, W., Mastepanov, M., Matamala, R., Matthes, J. H., Mazzenga, F.,  
351 McCaughey, H., McHugh, I., McMillan, A. M. S., Merbold, L., Meyer, W., Meyers, T.,  
352 Miller, S. D., Minerbi, S., Moderow, U., Monson, R. K., Montagnani, L., Moore, C. E.,  
353 Moors, E., Moreaux, V., Moureaux, C., Munger, J. W., Nakai, T., Neiryneck, J., Nestic,  
354 Z., Nicolini, G., Noormets, A., Northwood, M., Nosetto, M., Nouvellon, Y., Novick, K.,  
355 Oechel, W., Olesen, J. E., Ourcival, J. M., Papuga, S. A., Parmentier, F. J., Paul-  
356 Limoges, E., Pavelka, M., Peichl, M., Pendall, E., Phillips, R. P., Pilegaard, K., Pirk, N.,  
357 Posse, G., Powell, T., Prasse, H., Prober, S. M., Rambal, S., Rannik, U., Raz-Yaseef, N.,  
358 Rebmann, C., Reed, D., Dios, V. R., Restrepo-Coupe, N., Reverter, B. R., Roland, M.,  
359 Sabbatini, S., Sachs, T., Saleska, S. R., Sanchez-Canete, E. P., Sanchez-Mejia, Z. M.,  
360 Schmid, H. P., Schmidt, M., Schneider, K., Schrader, F., Schroder, I., Scott, R. L.,  
361 Sedlak, P., Serrano-Ortiz, P., Shao, C., Shi, P., Shironya, I., Siebicke, L., Sigut, L.,  
362 Silberstein, R., Sirca, C., Spano, D., Steinbrecher, R., Stevens, R. M., Sturtevant, C.,  
363 Suyker, A., Tagesson, T., Takanashi, S., Tang, Y., Tapper, N., Thom, J., Tomassucci,  
364 M., Tuovinen, J. P., Urbanski, S., Valentini, R., van der Molen, M., van Gorsel, E., van  
365 Huissteden, K., Varlagin, A., Verfaillie, J., Vesala, T., Vincke, C., Vitale, D.,

366 Vygodskaya, N., Walker, J. P., Walter-Shea, E., Wang, H., Weber, R., Westermann, S.,  
367 Wille, C., Wofsy, S., Wohlfahrt, G., Wolf, S., Woodgate, W., Li, Y., Zampedri, R.,  
368 Zhang, J., Zhou, G., Zona, D., Agarwal, D., Biraud, S., Torn, M., and Papale, D.: The  
369 FLUXNET2015 dataset and the ONEFlux processing pipeline for eddy covariance data,  
370 *Sci. Data*, 7, 225, 10.1038/s41597-020-0534-3, 2020.

371 Ren, H., Peng, S., Liu, H., Yu, Z., and Fang, D.: Study on litter and its ecological benefits of  
372 tropical artificial mixed forest in Xiaoliang, *J. Appl. Ecol.*, 11-15, 1998.

373 Rong, Y.: Study on dynamics of litter production, quality and decomposition of *Eucalyptus*  
374 *urophylla* × *Eucalyptus grandis* and *Acacia crassicarpa* plantations, Guangxi Universit,  
375 2009. (in Chinese)

376 Ryu, Y., Jiang, C., Kobayashi, H., and Detto, M.: MODIS-derived global land products of  
377 shortwave radiation and diffuse and total photosynthetically active radiation at 5 km  
378 resolution from 2000, *Remote Sens. Environ.*, 204, 812-825, 10.1016/j.rse.2017.09.021,  
379 2018.

380 Ryu, Y., Baldocchi, D. D., Kobayashi, H., van Ingen, C., Li, J., Black, T. A., Beringer, J., van  
381 Gorsel, E., Knohl, A., Law, B. E., and Rouspard, O.: Integration of MODIS land and  
382 atmosphere products with a coupled-process model to estimate gross primary  
383 productivity and evapotranspiration from 1 km to global scales, *Global Biogeochem.*  
384 *Cy.*, 25, n/a-n/a, 10.1029/2011gb004053, 2011.

385 Scheer, B. M., Gatti, G., Wisniewski, C., Mocoichinski, Y. A., Cavassani, T. A., Lorenzetto,  
386 A., and Putini, F.: Patterns of litter production in a secondary alluvial Atlantic Rain  
387 Forest in southern Brazil, *Braz. J. Bot.*, 32, 805-817, 2009.

388 Sharma, E. and Ambasht, R. S.: Litterfall, Decomposition and Nutrient Release in an Age  
389 Sequence of *Alnus Nepalensis* Plantation Stands in the Eastern Himalaya, *J. Ecol.*, 75,  
390 10.2307/2260309, 1987.

391 Silva-Filho, V. E., Machado, W., Oliveira, R. R., Sella M. S., Lacerda, and D. L.:Mercury  
392 deposition through litterfall in an Atlantic Forest at Ilha Grande, Southeast Brazil,  
393 *Chemosphere*, 65, 2477-2484, 2006.

394 Smith, M. N., Stark, S. C., Taylor, T. C., Ferreira, M. L., de Oliveira, E., Restrepo-Coupe, N.,  
395 Chen, S., Woodcock, T., dos Santos, D. B., Alves, L. F., Figueira, M., de Camargo, P.  
396 B., de Oliveira, R. C., Aragão, L. E. O. C., Falk, D. A., McMahon, S. M., Huxman, T. E.  
397 and Saleska, S. R.: Seasonal and drought-related changes in leaf area profiles depend on  
398 height and light environment in an Amazon forest. *New Phytol.*, 222, 1284-1297,  
399 10.1111/nph.15726, 2019.

400 Songwe, N. C., Okali, D. U. U., and Fasehun, F. E.: Litter decomposition and nutrient release  
401 in a tropical rainforest, Southern Bakundu Forest Reserve, Cameroon, *J. Trop. Ecol.*, 11,  
402 333-350, 10.1017/s0266467400008816, 1995.

403 Sundarapandian, S. M. and Swamy, P. S.: Litter production and leaf-litter decomposition of  
404 selected tree species in tropical forests at Kodayar in the Western Ghats, India, *Forest*  
405 *Ecol. Manag.*, 123, 231-244, 10.1016/s0378-1127(99)00062-6, 1999.

406 Tang, J.: Dynamics of litter fall and nutrient return in Eucalyptus grandis plantation, *Journal*  
407 *of Nanchang Institute of Technology*, 29, 60-64, 2010. (in Chinese)

408 Tramontana, G., Jung, M., Schwalm, C. R., Ichii, K., Camps-Valls, G., R'aduly, B.,  
409 Reichstein, M., Arain, M. A., Cescatti, A., Kiely, G., Merbold, L., Serrano-Ortiz, P.,  
410 Sickert, S., Wolf, S., and Papale, D.: Predicting carbon dioxide and energy fluxes across  
411 global FLUXNET sites with regression algorithms, *Biogeosciences*, 13, 4291-4313,  
412 2016.

413 Triadiati, Tjitrosemi, S., Guhardja, E., Sudarsono, Qayim, I., and Leuschner, C.: Litterfall  
414 production and leaf-litter decomposition at natural forest and cacao agroforestry in  
415 central Sulawesi, Indonesia, *Asian Journal of Biological Sciences*, 4, 221-234,  
416 10.3923/ajbs.2011.221.234, 2011.

417 Veefkind, J. P., Aben, I., McMullan, K., Förster, H., de Vries, J., Otter, G., Claas, J., Eskes,  
418 H. J., de Haan, J. F., Kleipool, Q., van Weele, M., Hasekamp, O., Hoogeveen, R.,  
419 Landgraf, J., Snel, R., Tol, P., Ingmann, P., Voors, R., Kruizinga, B., Vink, R., Visser,  
420 H., and Levelt, P. F.: TROPOMI on the ESA Sentinel-5 Precursor: A GMES mission for  
421 global observations of the atmospheric composition for climate, air quality and ozone  
422 layer applications, *Remote Sens. Environ.*, 120, 70-83, 10.1016/j.rse.2011.09.027, 2012.

423 Wang, M., Liu, Q., and Gao, J.: Litter dynamics of four plant communities affected by  
424 typhoon in the central hilly area of Hainan Island, *Journal of Hainan Normal University*  
425 *(Natural Science)*, 156-160, 2007. (in Chinese).

426 Weiss, A. and Norman, J. M.: Partitioning solar radiation into direct and diffuse, visible and  
427 near-infrared components, *Agr. Forest Meteorol.*, 34, 205-213, 10.1016/0168-  
428 1923(85)90020-6, 1985.

429 Wirth, R., Weber, B., and Ryel, R. J.: Spatial and temporal variability of canopy structure in a  
430 tropical moist forest, *Acta Oecol.*, 22(5-6), 2001.

431 Wu, J., Albert, L. P., Lopes, A. P., Restrepo-Coupe, N., Hayek, M., Wiedemann, K. T., Guan,  
432 K., Stark, S. C., Christoffersen, B., Prohaska, N., Tavares, J. V., Marostica, S.,  
433 Kobayashi, H., Ferreira, M. L., Campos, K. S., da Silva, R., Brando, P. M., Dye, D. G.,  
434 Huxman, T. E., Huete, A. R., Nelson, B. W., and Saleska, S. R.: Leaf development and  
435 demography explain photosynthetic seasonality in Amazon evergreen forests, *Science*,  
436 351, 972-976, 10.1126/science.aad5068, 2016.

437 Wu, Y.: Study on Litter and Nutrient Cycling in Four Kinds of Evergreen Plantations,  
438 *Guangxi Forestry Technology*, 38-41+28, 10.19692/j.cnki.gfs.1991.01.007, 1991. (in  
439 Chinese)

440 Wu, Z.: Litter quantity, composition and dynamics of human-promoted evergreen broad-  
441 leaved secondary forest, *Mountain Journal*, 215-221, 2006. (in Chinese)

442 Yamashita, N., Ohta, S., Sase, H., Luangjame, J., Visaratana, T., Kievuttinon, B., Garivait,  
443 H., and Kanzaki, M.: Seasonal and spatial variation of nitrogen dynamics in the litter and  
444 surface soil layers on a tropical dry evergreen forest slope, *Forest Ecol. Manag.*, 259,  
445 1502-1512, 10.1016/j.foreco.2010.01.026, 2010.

446 Yang, Y., Lin, P., Guo, J., Lin, R., Chen, G., He, Z., and Xie, J.: Litter quantity, nutrient  
447 return and litter decomposition in natural forest and plantation of *Castanopsis grizii*, *J.*  
448 *Ecol.*, 1278-1289, 2003.

449 Zeng, S.: Litter yield analysis of fast-growing tree species *Eucalyptus* and *Acacia* plantation,  
450 *Jilin Agriculture*, 231-232, 2011. (in Chinese)

451 Zhang, H., Yuan, W., Dong, W., and Liu, S.: Seasonal patterns of litterfall in forest ecosystem  
452 worldwide, *Ecol. Complex.*, 20, 240-247, 2014.

453 Zhao, P., Gao, L., Wei, J., Ma, M., Deng, H., Gao, J., and Chen, X.: Evaluation of ERA-  
454 Interim Air Temperature Data over the Qilian Mountains of China, *Adv. Meteorol.*,  
455 7353482, 10.1155/2020/7353482, 2020

456 Zhao, Y., Chen, X., Smallman, T. L., Flack-Prain, S., Milodowski, D. T., and Williams, M.:  
457 Characterizing the Error and Bias of Remotely Sensed LAI Products: An Example for  
458 Tropical and Subtropical Evergreen Forests in South China, *Remote Sens.*, 12, 3122,  
459 10.3390/rs12193122, 2020.

460 Zheng, J., Yang, z., Ling, h., and Chen, G.: Yield and monthly dynamics of litter in *Phoebe*  
461 plantation, *Journal of Fujian Normal University (Natural Science)*, 27, 88-92, 2011. (in  
462 Chinese)

463 Zou, B., Li, Z., Ding, Y., and Tan, W.: Litter dynamic characteristics of four plantation  
464 forests in South subtropical zone, *Journal of Ecology*, 715-721, 2006. (in Chinese)

465
